# Supplementary material for: GUN1 interacts with MORF2 to regulate plastid RNA editing during retrograde signaling
Source: PubMed Central journal article supplement — Proc Natl Acad Sci U S A. 2019 Apr 15;116(20):10162–7. doi: 10.1073/pnas.1820426116 (PMC6525534; doi:10.1073/pnas.1820426116), 2019-04-15
Supplement: pnas.1820426116.sapp.pdf [file pnas.1820426116.sapp.pdf]

Supplementary Information for

**GUN1 interacts with MORF2 to regulate plastid RNA editing during retrograde signaling**

Xiaobo Zhao<sup>a,b,1</sup>, Jianyan Huang<sup>a,b</sup>, Joanne Chory<sup>a,b,1</sup>

<sup>a</sup>Howard Hughes Medical Institute, Salk Institute for Biological Studies, La Jolla, CA, 92037, USA.

<sup>b</sup>Plant Biology Laboratory, Salk Institute for Biological Studies, La Jolla, CA, 92037, USA.

<sup>1</sup>To whom correspondence may be addressed. E-mail: [xbzhao16@gmail.com](mailto:xbzhao16@gmail.com) or [chory@salk.edu](mailto:chory@salk.edu).

**This PDF file includes:**

SI Material and Methods

Figs. S1 to S10

Tables S1 to S4

References for SI reference citations

**Other supplementary materials for this manuscript include the following:**

Datasets S1 to S2

## Supporting information

### SI Materials and Methods

**Plant Materials and Growth Condition.** *Col6-3* wild type, *gun1-8* and *gun1-9* mutants (1) were from our lab seed stock. *otp81* (*SALK\_092402*), *otp84* (*SALK\_120902*) and *ys1* (*SALK\_123515*) mutants were ordered from ABRC (2). *otp81otp84ys1* triple mutant was obtained by crossing the corresponding single mutants. Seeds were surface sterilized using chlorine gas for 4 hours and placed on 1/2 Linsmaier and Skoog (LS) medium (Caisson Laboratories) plate with 0.8% micropropagation type-1 agar (Caisson Laboratories). After a 4-day stratification in the dark at 4 °C, plates were moved to 24 h constant light condition under 100  $\mu\text{mol.m}^{-2}.\text{s}^{-1}$  light intensity at 22 °C for 5 days. For norflurazon treatment, norflurazon (NF) (Sigma Aldrich-SUPELCO) was added to the 1/2 LS medium at 5  $\mu\text{M}$  final concentration. For lincomycin treatment, lincomycin (Linc) (Sigma Aldrich) was added to the 1/2 LS medium at 220  $\mu\text{g/mL}$  final concentration. To eliminate the influence of interplay between sucrose and retrograde signaling pathway (3), no additional sucrose was supplied in the NF, Linc treatment or normal growth conditions. The AGI locus number of each gene is: *GUNI* (AT2G31400), *MORF2* (AT2G33430), *OTP81* (AT2G29760), *OTP84* (AT3G57430), *YS1* (AT3G22690), *LHCB1.2* (AT1G29910), *PLASTOCYANIN* (AT1G76100), *CA1* (AT3G01500), *LHCB2.2* (AT2G05070), *CPI2* (AT3G62410), *PPI2* (AT4G02510) and *PP2AA3* (AT1G13320). All the primers used for cloning and vectors construction are listed in Table S2.

**RNA Isolation and Analysis of Plastid RNA Editing.** Total RNA was isolated from pooled whole seedlings (Grown under 24 h light condition with 100  $\mu\text{mol.m}^{-2}.\text{s}^{-1}$  light intensity at 22 °C with 5  $\mu\text{M}$  NF or 220  $\mu\text{g/mL}$  Linc treatment for 5 days as indicated) using the RNeasy Plant Mini Kit (Qiagen) with dsDNase I treated. The first-strand cDNA was synthesized using Maxima First Strand cDNA Synthesis Kit for RT-qPCR (Thermo). PCR fragments containing chloroplast RNA editing sites were obtained with specific primers (Table S3) surrounding editing sites by RT-PCR using OneTaq<sup>®</sup> 2 $\times$  Master Mix with Standard Buffer (NEB). The following thermal condition was used for RT-PCR: 94 °C for 3 min, 33 cycles of 94 °C for 30 s, 52 °C for 45 s, 72 °C for 1 min. PCR products were then purified and used as templates for Sanger DNA sequencing (Sequencing was carried out by Eton Bioscience, San Diego, USA). The sequencing primer for each site is listed in Table S3. The “C” to “T” (equal C to U in RNA) editing level of each site was measured by the relative height of the peak of the nucleotide in sequence chromatograms and calculated by the height of “T” divided by the sum of the height of “T” and “C”. Statistical significances are calculated using two-tailed *Student's t*-Test in Excel.

**Yeast Two-Hybrid Assay.** The yeast two-hybrid assay was performed following the manual of Matchmaker<sup>™</sup> Gold Yeast Two-Hybrid System (Clontech) with modifications. Generally, the coding sequence (CDS) of each gene was cloned by RT-PCR using Phusion<sup>®</sup> High-Fidelity DNA Polymerase (NEB) and vectors were linearized by restriction enzymes EcoRI (for GUN1) or NdeI

and BamHI. Then insert genes were transferred to target plasmids using In-Fusion<sup>®</sup> HD Cloning Plus kit (Clontech). Combinations of GAL4 DNA binding domain (pGBKT7) and GAL4 activation domain (pGADT7) fusions of corresponding genes were co-transformed into the yeast strain AH109 (Clontech). Co-transformants were placed on SD/–Leu/–Trp dropout plates under 30 °C in dark for 5 days to verify successful co-transformation and then on SD/–Ade/–His/–Leu/–Trp/X-α-Gal dropout plates under 30 °C in dark for 5 days to verify the interaction.

**Bimolecular Fluorescence Complementation (BiFC) and Firefly Luciferase Complementation Imaging (LCI) Assay.** For BiFC assay, the CDS of each gene without stop codon was cloned by RT-PCR using Phusion<sup>®</sup> High-Fidelity DNA Polymerase (NEB) and transfer to target plasmids: pUC-pSPYNE173 for N-terminal YFP fusion or pUC-pSPYCE(M) for C-terminal YFP fusion (4). Vectors were digested by XbaI and Sall. Transfection-grade plasmid DNA was prepared using QIAGEN Plasmid Maxi Kit (Qiagen). For control plasmids, the coding sequence of transit peptide of OTP81 was cloned by PCR and ligated to the N terminal of YFP to test chloroplast localization. Then, the transit peptide of OTP81 was transferred to pUC-pSPYNE173 or pUC-pSPYCE(M) for N or C-terminal YFP fragment fusions targeting to chloroplasts, respectively. 20 µg of each transfection-grade plasmid was cotransformed into *Arabidopsis* protoplasts isolated from *Col-0* as previously described (5). Protoplasts were then incubated under constant 100 µmol.m<sup>-2</sup>.s<sup>-1</sup> light at 22 °C for 16-20 h and the fluorescence signal was determined using a Zeiss LSM 710 confocal laser scanning microscope.

For LCI assay, the CDS of each gene without stop codon was cloned and transfer to target plasmids: pUC19-NLuc for N-terminal luciferase fusion or modified pUC19-CLuc (cLuc is fused to the C-terminal of each gene) for C-terminal luciferase fusion (6). Vectors were digested by SacI or KpnI and Sall. 20 µg of each transfection-grade plasmid were cotransformed into *Arabidopsis* protoplasts and incubated under constant 100 µmol.m<sup>-2</sup>.s<sup>-1</sup> light condition at 22 °C for 16-20 h. Then, the D-luciferin (BIOSYNTH) was added to protoplasts at a final concentration of 1 mM and protoplasts were kept in dark for 10 min to quench the fluorescence. The relative luciferase activity was recorded using the Tecan Safire2<sup>™</sup> plate reader.

**Plant Transformation and Expression Level Detection.** For overexpression experiment, the whole fragment containing the cauliflower mosaic virus (CaMV) 35S promoter, the CDS of MORF2 (without stop codon) and the 3×HA-3×FLAG tag was cloned by PCR using Phusion<sup>®</sup> High-Fidelity DNA Polymerase (NEB) from MORF2 BiFC assay vector and then transferred to the modified binary vector pEarleyGate 101 (7) digested by restriction enzymes MluI and SpeI. In the final vector, the CDS of MORF2 (without stop codon) was driven by CaMV 35S promoter and fused with 3×HA-3×FLAG tags in the C-terminal. Plasmids were then transformed into *Agrobacterium tumefaciens* strain GV3101 to transform *Arabidopsis Col6-3* wild type plants using the floral-dip method (8). Transgenic plants with Basta resistance selected on Glufosinate-ammonium (Sigma) plates were further propagated and T3 homozygous seeds were chosen for further study. At least two independent lines were examined with similar results, and one

representative line was shown. The expression level of MORF2 in *MORF2OX* lines were examined by qPCR and western blot. Total RNA or protein was extracted from whole seedlings grown on 1/2 LS medium under 24 h constant light ( $100 \mu\text{mol.m}^{-2}.\text{s}^{-1}$ ) at 22 °C for 5 days. The qPCR analysis was as below and primers for *MORF2* were: MORF2-qF: 5'-ATCTCGGTTAGGTTGTTTC-3' and MORF2-qR: 5'-ATCATCTGCTGCTTAGTC-3'. The antibodies used for western blot were Anti-FLAG<sup>®</sup> M2-Peroxidase (HRP) antibody (A8592, Sigma) and Anti-Actin (plant) antibody (A0480, Sigma).

**Coimmunoprecipitation and Mass Spectrometric Analysis.** GUN1 overexpression line fused with GFP tag in the background of *gun1-9* (1) was crossed with *MORF2OX(w)* (fused with 3×HA and 3×FLAG tags) line to construct coexpression lines. F3 homozygous plants were used for the co-immunoprecipitation assay. Generally, 5 g total seedlings grown on 5  $\mu\text{M}$  NF plate under 24 h light ( $100 \mu\text{mol.m}^{-2}.\text{s}^{-1}$ ) at 22 °C for 5 days were collected. Then 25 mL immunoprecipitation (IP) buffer (50 mM Tris-HCl (pH 7.5), 150 mM NaCl, 5 mM MgCl<sub>2</sub>, 10% glycerol, 0.1% NP-40, 0.5 mM DTT, 1 mM PMSF, 1×complete protease inhibitor mixture (Roche), 10  $\mu\text{M}$  MG132) was added to the grinded samples and rotated at 4 °C for 10 min. The supernatants were separated by centrifugation for 30 min at 4°C, 13,500 rpm and incubated with 100  $\mu\text{L}$  Anti-FLAG<sup>®</sup> M2 Magnetic Beads (Sigma) for 2.5 h at 4 °C with rotation. Washed beads with 25 mL IP buffer once followed by five times wash with 1 ml IP buffer for 5 min each. Then binding proteins were eluted twice using 100  $\mu\text{L}$  of 3×FLAG peptide (Sigma) (150 ng/ $\mu\text{L}$ ) at 25 °C with rotation for 15 min each.

The Mass spectrometric analysis was performed at the Mass Spectrometry Core of the Salk Institute for Biological Studies. Generally, eluted protein complexes from co-immunoprecipitation were precipitated by methanol/chloroform. Dried pellets were dissolved in 8 M urea/100 mM TEAB, pH 8.5. Proteins were reduced with 5 mM tris (2-carboxyethyl) phosphine hydrochloride (TCEP, Sigma-Aldrich) and alkylated with 10 mM chloroacetamide (Sigma-Aldrich). Proteins were digested overnight at 37 °C in 2 M urea/100 mM TEAB, pH 8.5, with trypsin (Promega). Digestion was quenched with formic acid, 5% final concentration. Digested samples were analyzed on a Fusion Orbitrap tribrid mass spectrometer (Thermo). Protein and peptide identification were done with Integrated Proteomics Pipeline - IP2 (Integrated Proteomics Applications). Tandem mass spectra were extracted from raw files using RawConverter (9) and searched with ProLuCID (10) against UniProt database with reversed sequences. The search space included all fully-tryptic and half-tryptic peptide candidates. Data were searched with 50 ppm precursor ion tolerance and 600 ppm fragment ion tolerance. Identified proteins were filtered to using DTASelect (11) and utilizing a target-decoy database search strategy to control the false discovery rate to 1% at the protein level (12).

***gun* Phenotype Assay with qPCR Analysis.** For *gun* phenotype assay, retrograde signaling marker genes expression were checked by qPCR. RNA samples were isolated from pooled whole seedlings grown under 24 h light condition with  $100 \mu\text{mol.m}^{-2}.\text{s}^{-1}$  light intensity at 22 °C with 5

$\mu$ M NF or 220  $\mu$ g/mL Linc treatment for 5 days. The first-strand cDNA was synthesized using Maxima First Strand cDNA Synthesis Kit for RT-qPCR (Thermo). qPCR was performed on a CFX384™ Real-Time PCR Detection System (Bio-rad) using iTaq™ Universal SYBR® Green Supermix (Bio-rad). The following thermal condition was used: 95 °C for 3 min, 45 cycles of 95 °C for 10 s and 60 °C for 30 s. Expression levels for all assayed genes were normalized using *PP2AA3* (AT1G13320) (13) as the internal control. Primers used for qPCR are listed in Table S4. Statistical significances are calculated using two-tailed *Student's t* test in Excel.

**RNA-sequencing and Data Analysis.** Total RNA samples for RNA-sequencing (RNA-seq) were prepared as same as used in the RNA editing analysis. Two biological replicates of each genotype were sequenced. 500 ng total RNA of each sample was used to prepare RNA-seq libraries using the TruSeq Stranded mRNA Library Prep Kit (Illumina). Single-end sequencing was run on Illumina HiSeq 2500 sequencing machine (Illumina). BRB-SeqTools (<https://brb.nci.nih.gov/seqtools/>) was used to calculate the raw count of each gene. In detail, raw reads were aligned to *Arabidopsis* reference genome (TAIR10) using TopHat version 2.1.1 (14) with bowtie2-2.3.1 (15) and gene-level raw counts data files were generated using HTSeq version 0.6.1 (16). Chloroplast and mitochondria genes were excluded from further analysis. Raw counts were applied to Bioconductor package edgeR (17) in R language to get the Reads Per Kilobase of transcript per Million mapped reads (RPKM) of each gene and to identify differentially expressed genes (DEGs). When identifying DEGs, a gene was retained only if it was expressed at a count-per-million (CPM) above 0.5 in at least two samples. Genes had a log<sub>2</sub>-converted fold change  $\geq 1$  or  $\leq -1$  with a False Discovery Rate (FDR)  $\leq 0.05$  were considered as DEGs. Venn diagrams were generated using interactivenn (<http://www.interactivenn.net/>) (18) and modified manually. The significance of overlaps in Venn diagrams was calculated using the hypergeometric distribution method in R language. The gene ontology (GO) term enrichment was analyzed using agriGO v2.0 (<http://systemsbiology.cau.edu.cn/agriGOv2/>) (19) and terms with an FDR  $< 0.01$  were retained for further analysis. Heatmaps were generated using the pheatmap program (package version 1.0.8) in R language. The list of photosynthesis genes was according to Sun et al, 2013 (20). The RNA-seq raw data have been deposited into the NCBI Gene Expression Omnibus database under the accession number GSE110125.

**Mutant Genotyping.** Homozygous T-DNA insertion mutant lines were identified using mutant gene-specific primers and T-DNA left-border primer (LBb1.3, 5'-ATTTTGCCGATTTTCGGAAC-3'). Mutant gene-specific primers used are: *otp81*, 5'-GTCGTTCCATGTAATTGGGTG-3' and 5'-GCTAAGAACAGGGTCTGGTCC-3'; *otp84*, 5'-GTCATGTCCTCTTGCCTTAC -3' and 5'- GGAATTCTCATCCAAAGAGCC -3'; *ys1*, 5'-TCAAACAACTTCCTTGCACC-3' and 5'- TCGAGGATATGCATCTTCTGG-3'. PCR was carried out using the OneTaq® 2× Master Mix with Standard Buffer (NEB). The following thermal condition was used: 94 °C for 5 min, 35 cycles of 94 °C for 30 s, 52 °C for 45 s, 72 °C for 1 min.

## Supplemental Figures

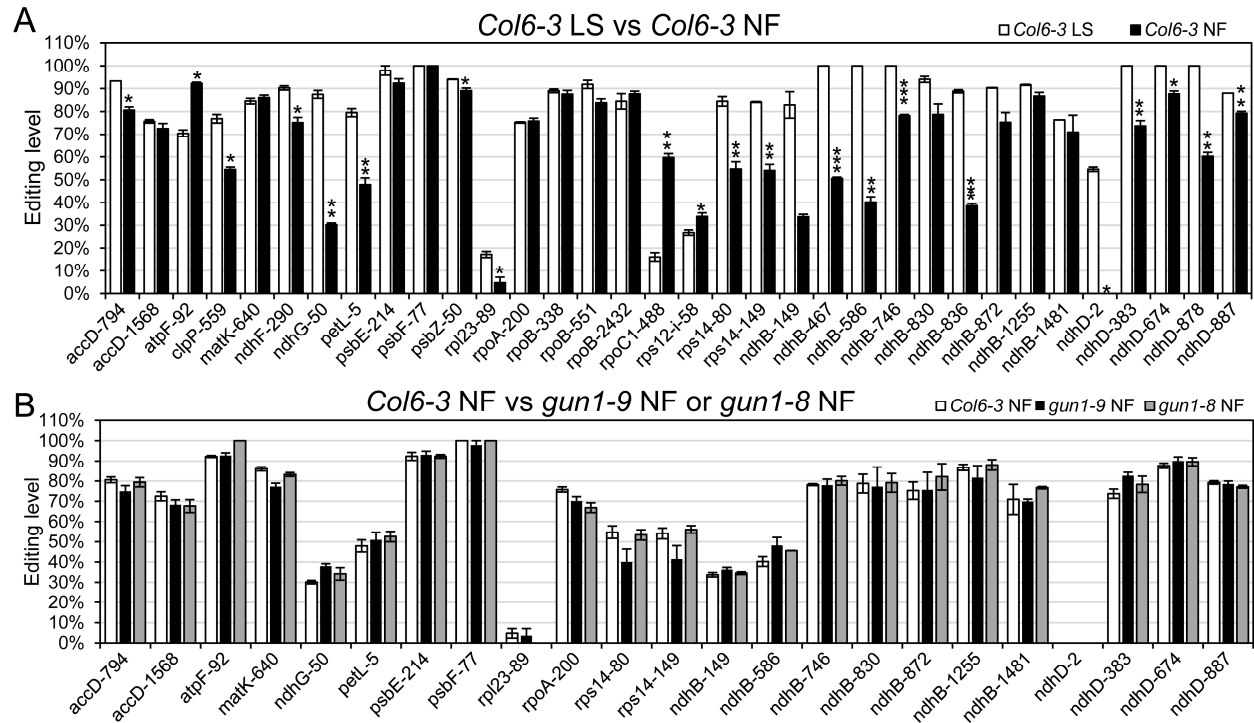

**Fig. S1.** Plastid RNA-editing profiles in wild type and *gun1* mutants under NF treatment. The *x* axis indicates different RNA-editing sites. The *y* axis represents the editing level of each site. Data are mean  $\pm$  SEM from two (LS) or three (NF) biological replicates. *Col6-3* is the wild type. (A) The comparison of RNA-editing level changes in wild type *Col6-3* between with (NF) and without NF (LS) treatments. Asterisks represent significance level  $*p < 0.05$ ,  $**p < 0.01$ ,  $***p < 0.001$  (two-tailed Student's *t* test) compared with in *Col6-3* LS. (B) The RNA-editing profile of sites that were not significantly affected in *gun1* mutants compared with wild type under NF treatment.

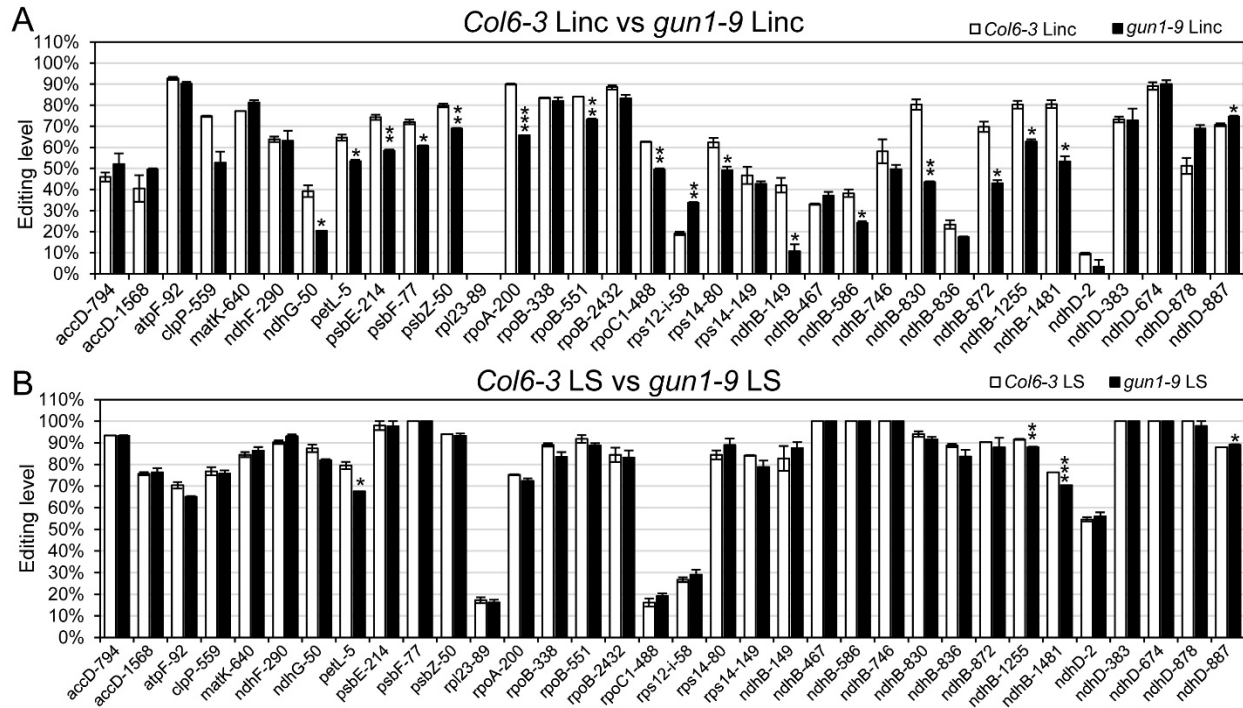

**Fig. S2.** Plastid RNA-editing profiles in Linc-treated or untreated wild-type and *gun1-9* seedlings. The x axis indicates different RNA-editing sites. The y axis represents the editing level of each site. Data are mean  $\pm$  SEM from two biological replicates. *Col6-3* is the wild type. (A) The comparison of RNA-editing profile between wild type and *gun1-9* under Linc treatment. Asterisks represent significance level  $*p < 0.05$ ,  $**p < 0.01$ ,  $***p < 0.001$  (two-tailed Student's *t* test) compared with in wild type. (B) The comparison of RNA-editing profile between wild type and *gun1-9* under normal growth condition (LS). Asterisks represent significance level  $*p < 0.05$ ,  $**p < 0.01$ ,  $***p < 0.001$  (two-tailed Student's *t* test) compared with in wild type.

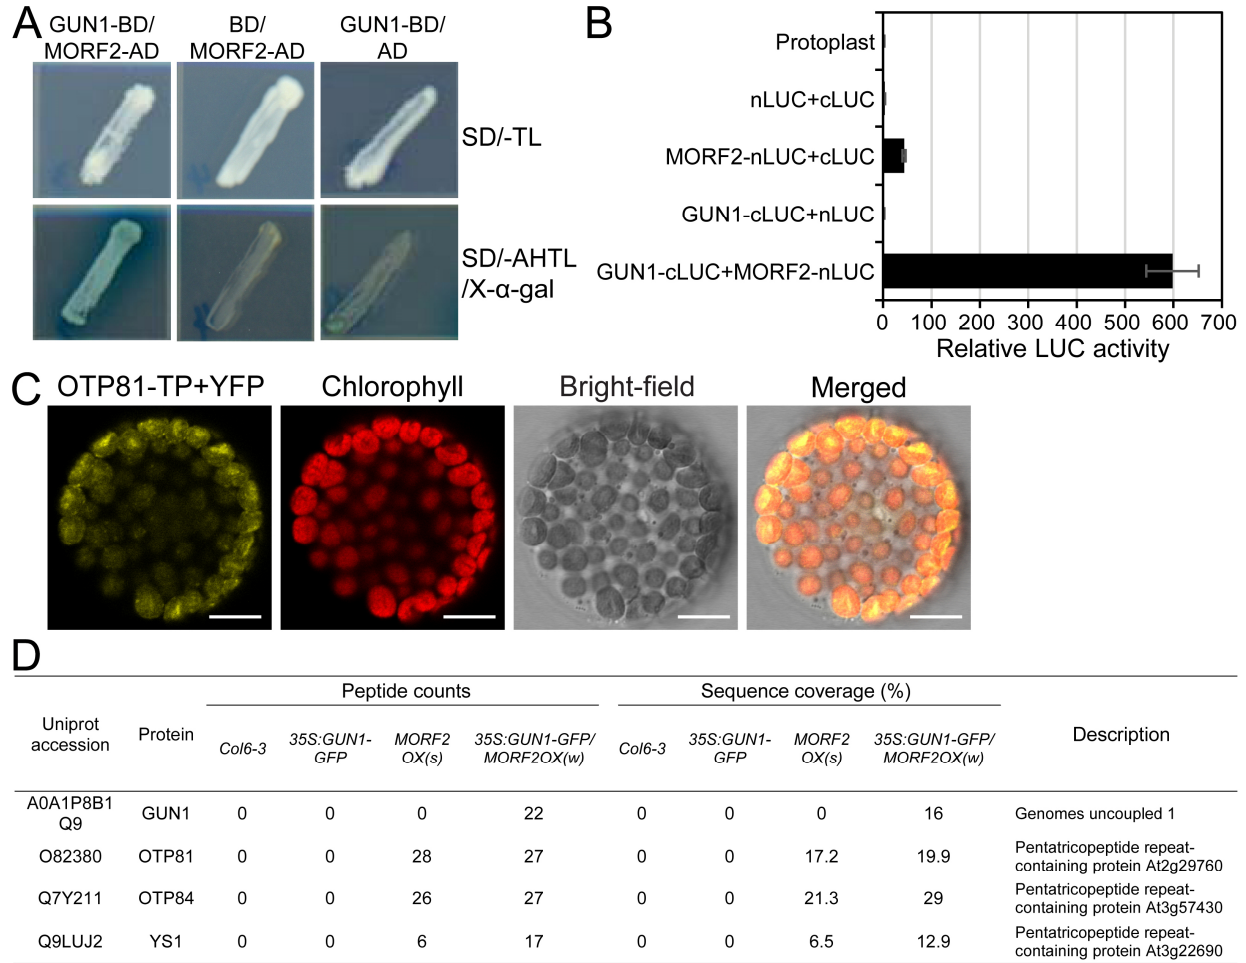

**Fig. S3.** Protein interaction assays show that GUN1 interact with MORF2. (A) Y2H assays show the interaction between GUN1 and MORF2 in yeast. AD and BD represent the GAL4 activation and DNA binding domain, respectively. SD/-TL and SD/-AHTL/X- $\alpha$ -gal indicate the SD/-Trp/-Leu and SD/-Ade/-His/-Trp/-Leu/X- $\alpha$ -gal dropout plates, respectively. The growth of colonies on SD/-TL indicates the successful cotransformation. The growth as well as the blue color of the colonies on SD/-AHTL/X- $\alpha$ -gal plate showing the reporter genes activity indicate the interaction. (B) The LCI assay confirms the interaction between GUN1 and MORF2 in plant. The x axis represents the relative luciferase activity. The y axis represents different co-transformations. Data are mean  $\pm$  SEM from three biological replicates. nLUC: N-terminal luciferase, cLUC: C-terminal luciferase. Co-transformation leading to LUC complementation showing relative high luciferase activities indicate interactions. Target proteins coexpressed with corresponding empty vectors as well as protoplast are negative controls. (C) The YFP protein can be targeted to chloroplasts by the transit peptide of OTP81. OTP81-TP+YFP: YFP fused with the OTP81 transit peptide. Red auto-fluorescence from chlorophyll indicates the localization of chloroplasts. Bright-field images correspond to protoplast cells. Merged images show the colocalization of YFP and chloroplasts. (Scale bar, 10  $\mu$ m). (D) The Mass Spectrometric analysis of partial proteins identified by coimmunoprecipitation of MORF2.



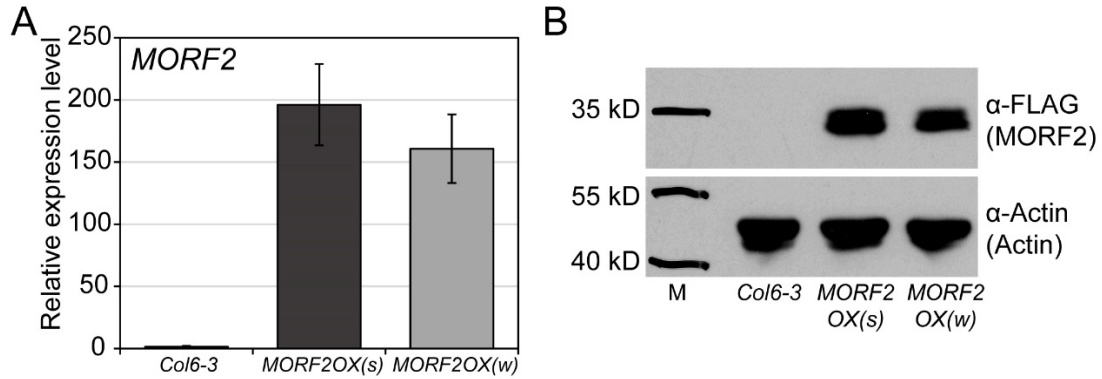

**Fig. S4.** Expression levels of *MORF2* in *MORF2* overexpression lines. (A) Elevated expressions of *MORF2* in *MORF2OX(s)* and *MORF2OX(w)* lines. Total RNAs were isolated from whole seedlings grown on 1/2 LS medium under 24 h light ( $100 \mu\text{mol.m}^{-2}.\text{s}^{-1}$ ) at 22 °C for 5 days. The *x* axis indicates samples. The *y* axis represents the relative expression level and the expression level in *Col6-3* is set to one. Data are mean  $\pm$  SEM (three biological replicates). (B) *MORF2* protein expression levels in *MORF2OX(s)* and *MORF2OX(w)* lines. *MORF2* protein levels were detected by FLAG antibodies (top panel). The bottom panel showing expression levels of Actin works as the loading control. M: protein marker. kD, kilo Dalton.

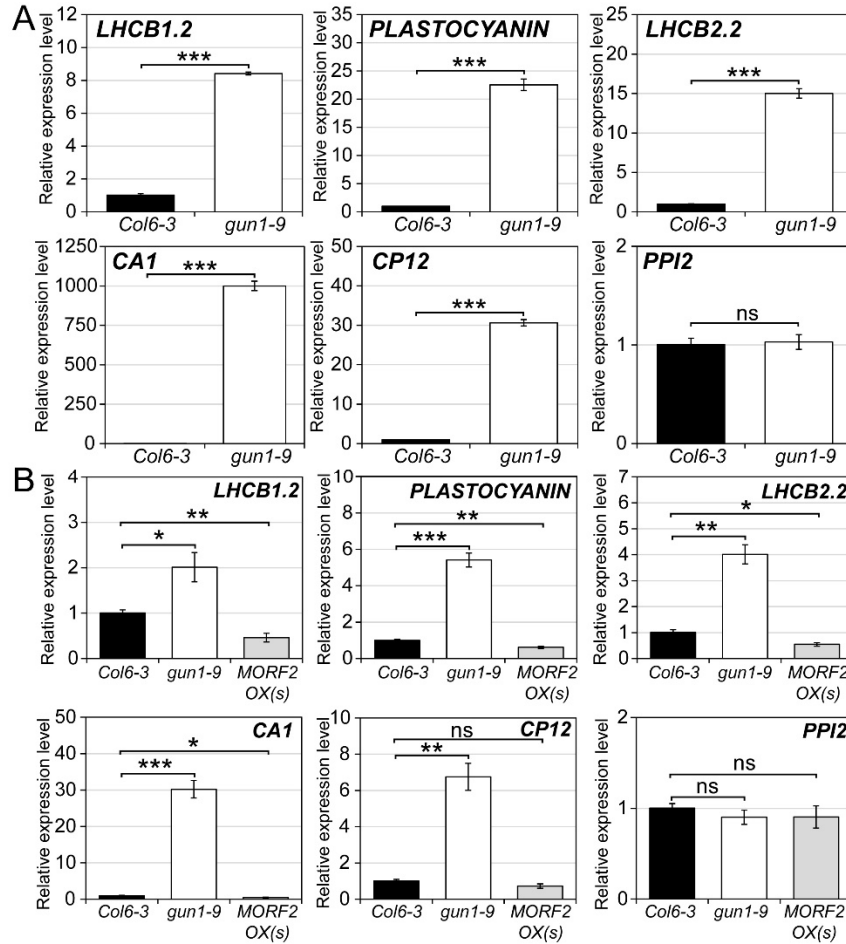

**Fig. S5.** Expression levels of retrograde signaling marker genes in NF-treated *gun1-9* mutant seedlings as well as in Linc-treated *gun1-9* and *MORF2OX(s)* seedlings. *Col6-3* is the wild type. Total RNAs were isolated from whole seedlings grown under 5  $\mu\text{M}$  NF or 220  $\mu\text{g}/\text{mL}$  Linc treatment under 24 h light ( $100 \mu\text{mol}\cdot\text{m}^{-2}\cdot\text{s}^{-1}$ ) at 22  $^{\circ}\text{C}$  for 5 days. The *x* axis indicates samples. The *y* axis represents the relative expression level and the expressions of each gene in *Col6-3* are set to one. The *PPI2* gene is the negative control. Data are mean  $\pm$  SEM (three biological replicates) (\* $p < 0.05$ , \*\* $p < 0.01$ , \*\*\* $p < 0.001$ , (ns) not significant, two-tailed Student's *t* test). (A) The qPCR analysis of retrograde signaling marker genes expressions in NF-treated *gun1-9* mutant seedlings. (B) The qPCR analysis of retrograde signaling marker genes expression in Linc-treated *gun1-9* and *MORF2OX(s)* seedlings.

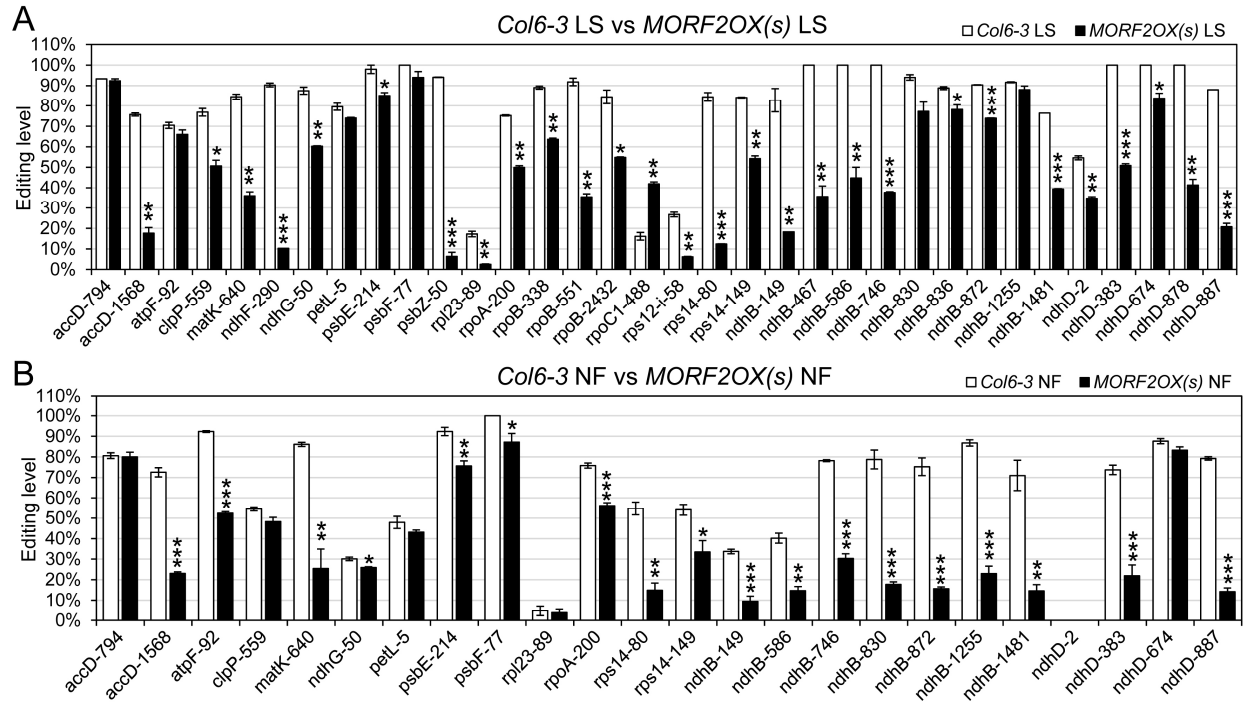

**Fig. S6.** Plastid RNA-editing profiles in untreated (LS) and NF-treated (NF) *MORF2OX(s)* seedlings. The *x* axis indicates the different RNA-editing sites. The *y* axis represents the editing level of each site. Data are mean  $\pm$  SEM from two (LS) or three (NF) biological replicates. *Col6-3* is the wild type. (A) The plastid RNA-editing profile in untreated *MORF2OX(s)* seedlings. Asterisks represent significance level  $*p < 0.05$ ,  $**p < 0.01$ ,  $***p < 0.001$  (two-tailed Student's *t* test) compared with in *Col6-3* LS. (B) The plastid RNA-editing profile in NF-treated *MORF2OX(s)* seedlings. The sites that are not overlapped with *gun1* mutation affected sites are listed. Asterisks represent significance level  $*p < 0.05$ ,  $**p < 0.01$ ,  $***p < 0.001$  (two-tailed Student's *t* test) compared with in *Col6-3* NF.

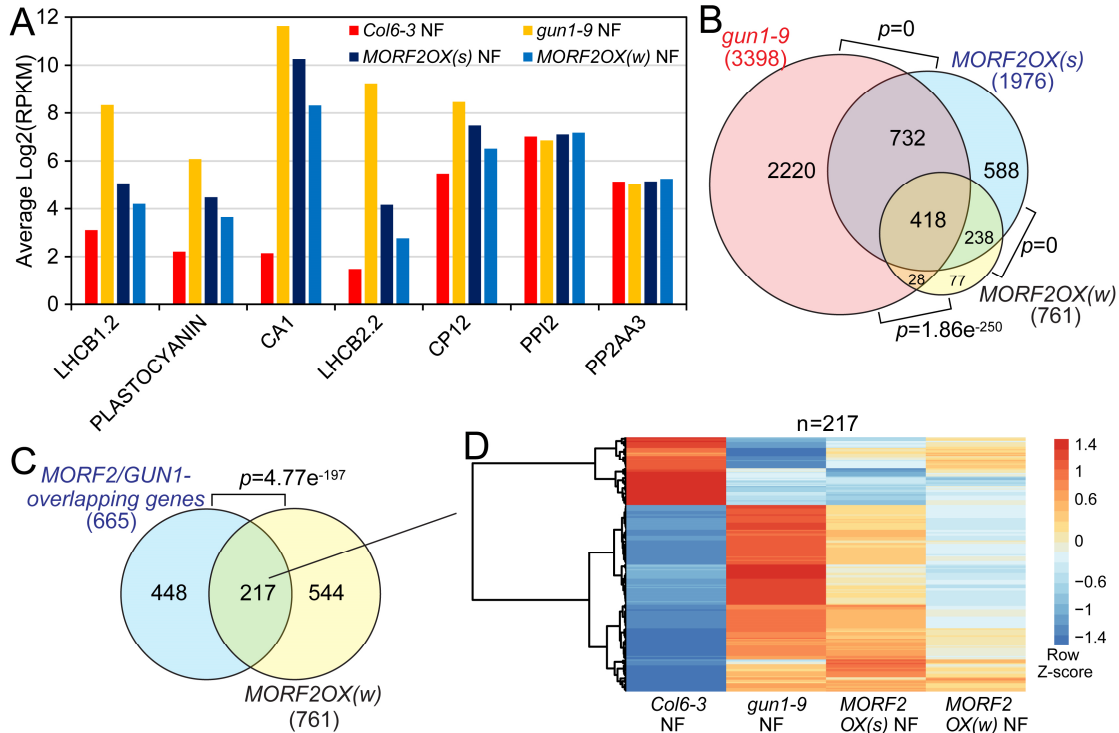

**Fig. S7.** RNA-sequencing data show *gun* phenotypes of *MORF2OX(s)* and *MORF2OX(w)* lines. (A) Expression levels of retrograde signaling marker genes from RNA-sequencing data. *PPI2* is the negative control gene and *PP2AA3* is the internal control gene used in the qPCR analysis. The *x* axis indicates different genes. The *y* axis represents the log<sub>2</sub>-transformed average RPKM (Reads Per Kilobase of transcript per Million mapped reads) of each gene. (B) The Venn diagram shows DEGs overlap among *gun1-9*, *MORF2OX(s)* and *MORF2OX(w)* (*MORF2OX(w)* NF vs *Col6-3* NF) under NF treatment. (C) The Venn diagram shows the overlap of MORF2/GUN1-overlapping retrograde signaling genes (MORF2/GUN1-overlapping genes) and *MORF2OX(w)* DEGs. *P* values in B-C show the statistical significance of the overlap between two groups of genes in Venn diagrams. (D) The heatmap displays the expression profile of 217 overlapping genes (from Fig. S7C, including all retrograde signaling marker genes) in different samples under NF treatment showing *MORF2OX(w)*'s relatively weaker *gun* phenotype. The heatmap shows the Z-score value of log<sub>2</sub>-transformed average (RPKM+0.001) of each gene. A background 0.001 is added to the RPKM of each gene to avoid minus infinity.

**A Top 50 GO terms of GUN1-dependent retrograde signaling genes**

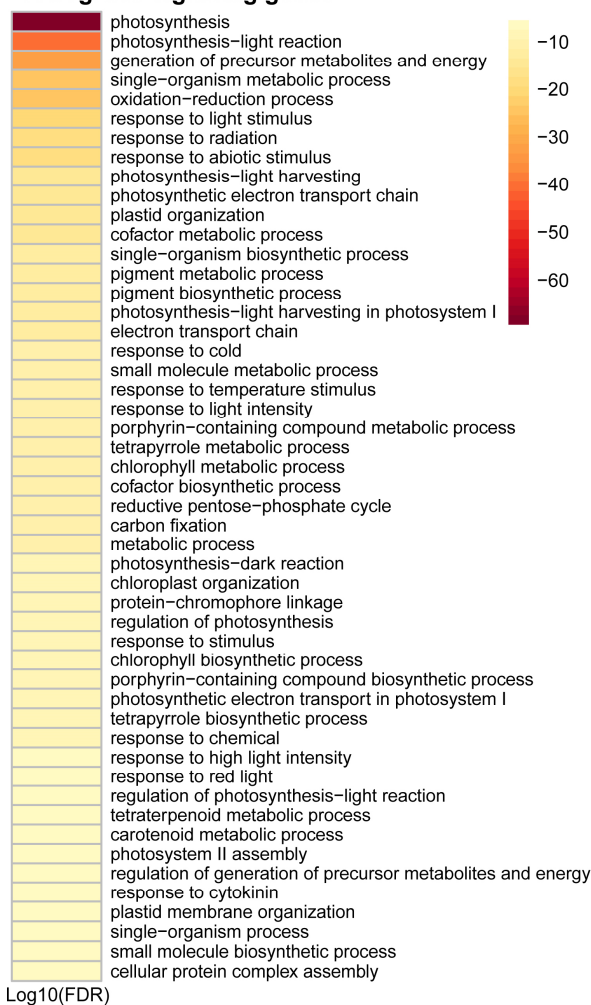

**B Top 50 GO terms of MORF2/GUN1-overlapping retrograde signaling genes**

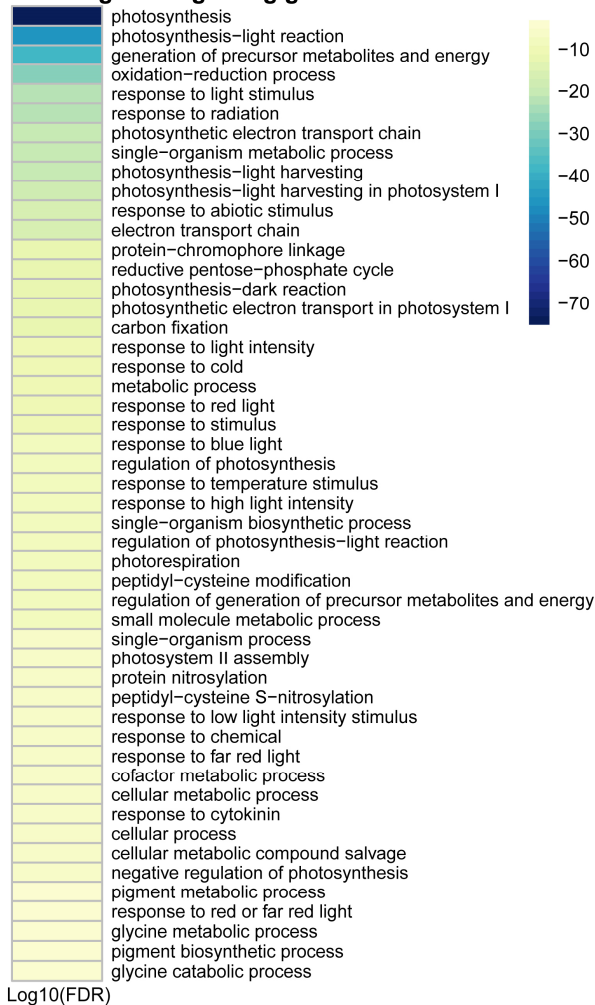

**Fig. S8.** Top 50 Gene Ontology (GO) terms show the similar enrichment between GUN1-dependent retrograde signaling genes and MORF2/GUN1-overlapping retrograde signaling genes. GO terms are ordered based on the log<sub>10</sub>-transformed FDR (false discovery rate) of each GO term. (A) Top 50 GO terms of GUN1-dependent retrograde signaling genes. (B) Top 50 GO terms of MORF2/GUN1-overlapping retrograde signaling genes.

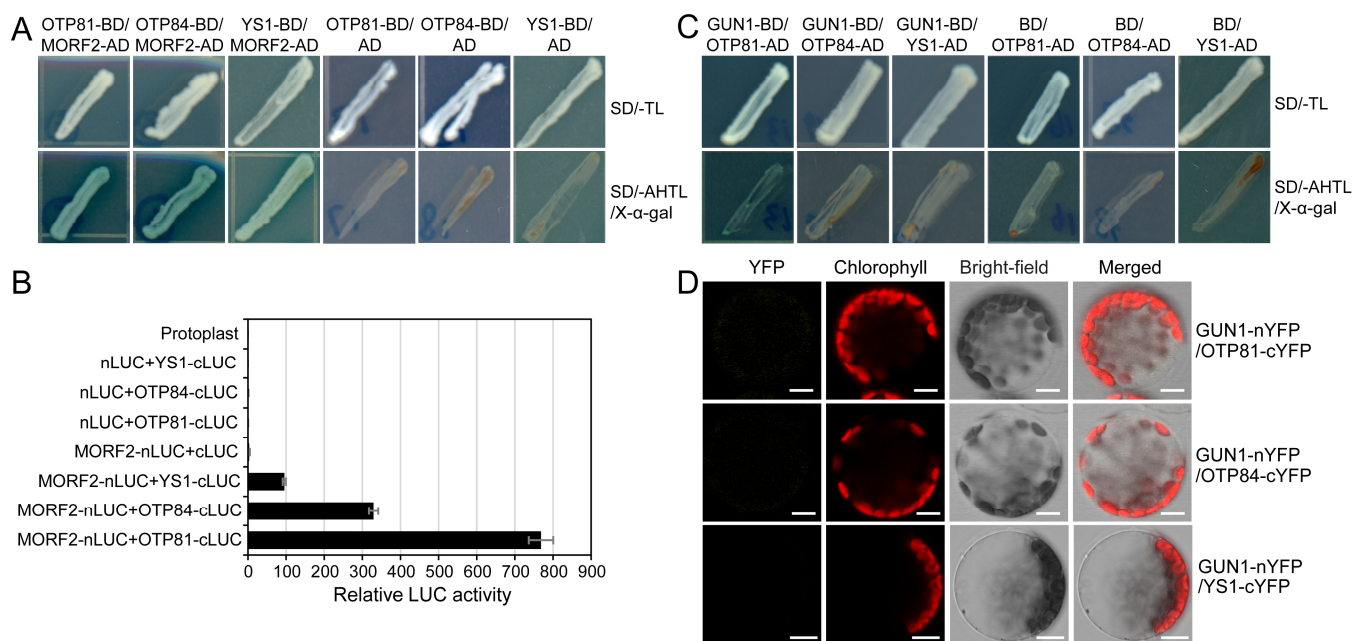

**Fig. S9.** Protein interaction assays show that MORF2 can interact with OTP81, OTP84, and YS1 but GUN1 cannot interact with OTP81, OTP84, or YS1. (A) Y2H assays show that MORF2 interact with OTP81, OTP84, and YS1 in yeast. AD and BD represent the GAL4 activation and the DNA binding domain, respectively. SD/-TL and SD/-AHTL/X- $\alpha$ -gal indicate SD/-Trp/-Leu and SD/-Ade/-His/-Trp/-Leu/X- $\alpha$ -gal dropout plates, respectively. The growth of colonies on SD/-TL indicates the successful cotransformation. The growth, as well as the blue color of colonies on SD/-AHTL/X- $\alpha$ -gal plates showing reporter genes activity, indicate interactions. (B) LCI assays confirm interactions of MORF2 with OTP81, OTP84, and YS1 in plant. The x axis represents the relative luciferase activity. The y axis indicates different cotransformations. Data are mean  $\pm$  SEM from three biological replicates. nLUC: N-terminal luciferase, cLUC: C-terminal luciferase. Cotransformation leading to LUC complementation showing relative high luciferase activities indicate the interactions. Target proteins coexpressed with corresponding empty vectors as well as protoplast are negative controls. (C) Y2H assays show that GUN1 cannot interact with OTP81, OTP84, or YS1 in yeast. (D) BiFC assays show that GUN1 cannot interact with OTP81, OTP84, or YS1 in plants. nYFP: N-terminal YFP, cYFP: C-terminal YFP. Chlorophyll red auto-fluorescence indicates the localization of chloroplasts. Bright-field images correspond to protoplast cells. Merged images show colocalizations of YFP and chloroplasts. (Scale bar, 10  $\mu$ m).

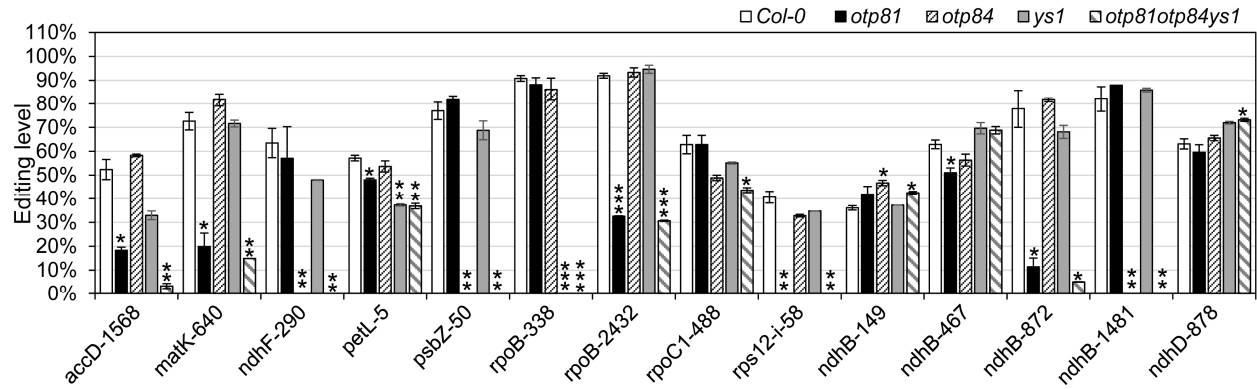

**Fig. S10.** Plastid RNA-editing profiles in NF-treated *otp81*, *otp84*, and *ys1* single and *otp81otp84ys1* triple mutant seedlings. The x axis indicates different RNA-editing sites. The y axis represents the editing level of each site. Data shown are the mean  $\pm$  SEM from two biological replicates. *Col-0* is the wild type. Asterisks represent significance level \* $p < 0.05$ , \*\* $p < 0.01$ , \*\*\* $p < 0.001$  (two-tailed Student's *t* test) compared with in *Col-0*.

**Table S1** The expression profile of genes for *gun1* mutation-affected site associated PLS-PPR proteins and broad-effect plastid RNA-editing factors in NF-treated *gun1-9* seedlings.

| Type     | Name              | LOC       | Log2(FC)<br><i>gun1-9</i> vs <i>Col6-3</i> | Differentially<br>expressed?* | FDR<br>(false discovery rate) |
|----------|-------------------|-----------|--------------------------------------------|-------------------------------|-------------------------------|
| PLS-PPR  | <i>CLB19</i>      | AT1G05750 | 0.23                                       | No                            | 0.377174007                   |
|          | <i>CRR22</i>      | AT1G11290 | 1.63                                       | Yes                           | 2.527E-16                     |
|          | <i>CRR28</i>      | AT1G59720 | 1.74                                       | Yes                           | 1.29259E-10                   |
|          | <i>DOT4</i>       | AT4G18750 | 0.02                                       | No                            | 0.936900458                   |
|          | <i>OTP81/QED1</i> | AT2G29760 | 0.20                                       | No                            | 0.350009251                   |
|          | <i>OTP82</i>      | AT1G08070 | -0.01                                      | No                            | 0.972989224                   |
|          | <i>OTP84</i>      | AT3G57430 | 0.80                                       | No                            | 0.000190692                   |
|          | <i>YSI</i>        | AT3G22690 | -0.69                                      | No                            | 0.009531494                   |
| MORF/RIP | <i>MORF2/RIP2</i> | AT2G33430 | 0.19                                       | No                            | 0.281081422                   |
|          | <i>MORF8/RIP1</i> | AT3G15000 | -0.38                                      | No                            | 0.010482583                   |
|          | <i>MORF9/RIP9</i> | AT1G11430 | 0.66                                       | No                            | 0.000608298                   |
| ORRM     | <i>ORRM1</i>      | AT3G20930 | 0.61                                       | No                            | 1.59749E-05                   |
| OZ       | <i>OZI</i>        | AT5G17790 | 0.71                                       | No                            | 1.35848E-06                   |
|          | <i>PPO1</i>       | AT4G01690 | 0.97                                       | No                            | 2.33762E-08                   |

\*Genes had a log<sub>2</sub>-converted fold change  $\geq 1$  or  $\leq -1$  with a False Discovery Rate (FDR)  $\leq 0.05$  were considered as differentially expressed genes.





**Table S3** PCR and sequencing primers used in the RNA editing analysis.

| No. | Editing site | Forward primer | Primer sequence (F)<br>5' - 3'  | Reverse primer | Primer sequence (R)<br>5' - 3'       | Sequencing primer name | Sequencing primer<br>sequence 5' - 3' |
|-----|--------------|----------------|---------------------------------|----------------|--------------------------------------|------------------------|---------------------------------------|
| 1   | accD-794     |                |                                 |                |                                      | accD-956SR             | CCGTTTAGTTGACCTGTAC<br>CTGTTT         |
| 2   | accD-1568    | accD-F         | GTGGATTCAATGCGACAAT             | accD-R         | ATATGCAAGCAAGGGAG<br>G               | accD-1285SL            | GCATTTGCGGGTAAAAGAG<br>T              |
| 3   | atpF-92      | atpF-92F       | CCGATTCTTTTCGTTTACTTG           | atpF-92R       | AGGGTTCCTATAGCTCC<br>TTG             | atpF-92F               | CCGATTCTTTTCGTTTACTTG                 |
| 4   | clpP-559     | clpP-559F      | ATGATCCATCAACCCGCTAG            | clpP-559R      | TATTGAACCGCTACAAG<br>ATC             | clpP-397SL             | TATGAGGCACAAAACGGGA<br>GA             |
| 5   | matK-640     | matK-640F      | CGTTACCGGGTAAAAGATGC            | matK-640R      | AGCGGCGTATCCTTTGT<br>TGC             | matK-813SL             | TTTTCCATAGAATACAATT<br>CGCTCA         |
| 6   | ndhF-290     | ndhF-290F      | AAAACCTTCGCCGCATGTGG            | ndhF-290R      | GCATTCGCTGCAATAGG<br>TCG             | ndhF-290R              | GCATTCGCTGCAATAGGTC<br>G              |
| 7   | ndhG-50      | ndhG-50F       | ATAATGGATTGCTGGACC              | ndhG-50R       | CTTATTAATCTTGCTCT<br>AGA             | ndhG-312SR             | ACAAACCAACGAAGTAAT<br>CCCA            |
| 8   | petL-5       | petL-5F        | AGGGAAGTACTTTAAGAATC            | petL-5R        | ATCTGGTT<br>ATTAGACCTAAGACGAT<br>TCC | petL-175SR             | ACACGGTAAGGAACATCG<br>AACA            |
| 9   | psbE-214     | psbE-214F      | ACAGGAGAACGTTCTTTTGC            | psbE-214R      | CGTTGGATGAACTGCAT<br>TGC             | psbE-214F              | ACAGGAGAACGTTCTTTTG<br>C              |
| 10  | psbF-77      |                |                                 |                |                                      |                        |                                       |
| 11  | psbZ-50      | psbZ-50F       | AGAACATAGCCCTATGAGTT<br>AATACGA | psbZ-50R       | GATAAGAGAATTAAGGA<br>TACC<br>CACCA   | psbZ-SL                | GCTATGAGTTAATACGATC<br>CCTA           |
| 12  | rpl23-89     | rpl23-89F      | AATTCCTACTGGATGCACGC            | rpl23-89R      | AAGAGGTGGAATAGAAT<br>AACCCG          | rpl23-89R              | AAGAGGTGGAATAGAATA<br>AACCCG          |
| 13  | rpoA-200     | rpoA-200F      | CGGACACTACAGTGGAAAGTG           | rpoA-200R      | ATGAATACAGCATCGAT<br>AGG             | rpoA-384SR             | TTCCACAGCGGGCGGTAA                    |
| 14  | rpoB-338     |                |                                 |                |                                      |                        |                                       |
| 15  | rpoB-551     | rpoB-338F      | TATCGGTTTATTGATCAGGG            | rpoB-338R      | GCAGCTGCTAACACATC<br>TCG             | rpoB-193SL             | AAAGAACGAGATGCTGTCT<br>ATGAA          |
| 16  | rpoB-2432    | rpoB-2432F     | AACACCTCAAGTGCGAAAG             | rpoB-2432R     | GTCCATACATTCATGCGT<br>GAG            | rpoB-2244SL            | GGCGAAAGAATCCTCCTAT<br>GC             |
| 17  | rpoC1-488    | rpoC1-488F     | TTTTCTTTTCTAGGCCATAA            | rpoC1-488R     | TTCGCAAATCTAAATCG<br>GCT             | rpoC1-593SR            | GCACCCGCCCCAGTAGAA                    |
| 18  | rps12-i-58   | rps12-intF     | CAAGACAGCCAATCCGAAAC            | rps12-intR     | CTTGTACAATTCACATTC<br>TTTGGC         | rps12-int-SR           | TTTACCCTGTTAGTCCGTTT<br>TTTTC         |
| 19  | rps14-80     |                |                                 |                |                                      |                        |                                       |
| 20  | rps14-149    | rps14-80F      | TTGATTTATAGGGAGAAGAAG<br>AG     | rps14-149R     | TACCAGCTTGATCTTGTT<br>GC             | rps14-266SR            | GCCTGAACCATTTCGCCAA<br>G              |
| 21  | ndhB-149     |                |                                 |                |                                      | ndhB-346SR             | CGGATAGAGGAATACAGA<br>GAGTTGA         |
| 22  | ndhB-467     | ndhB-1F        | GCCTTTCATTGCTTCTCTT             | ndhB-1R        | TCCTTCGTATACGTCAG<br>GA              | ndhB-271SL             | TTCCAACGAACAATTCA<br>ACG              |
| 23  | ndhB-586     |                |                                 |                |                                      |                        |                                       |
| 24  | ndhB-746     |                |                                 |                |                                      |                        |                                       |
| 25  | ndhB-830     |                |                                 |                |                                      |                        |                                       |
| 26  | ndhB-836     |                |                                 |                |                                      | ndhB-1041SR            | CCACCATTGAGTCTCCAA<br>CA              |
| 27  | ndhB-872     | ndhB-2F        | CGTATACGAAGGATCTCCAC            | ndhB-2R        | CTAGAAGCTAAAAAGGG<br>TATCCT          |                        |                                       |
| 28  | ndhB-1255    |                |                                 |                |                                      | ndhB-1018SL            | ATTGTTGGAGACTCAAATG<br>GTGG           |
| 29  | ndhB-1481    |                |                                 |                |                                      |                        |                                       |
| 30  | ndhD-2       |                |                                 |                |                                      | ndhD-252SR             | TCCATCTATCCCATCTCC<br>AGTA            |
| 31  | ndhD-383     |                |                                 |                |                                      |                        |                                       |
| 32  | ndhD-674     | ndhD-F         | TTGAGTACGCGTTCTTTGGAC           | ndhD-R         | AATAGCTCCATTAAGTC<br>CAGG            | ndhD-303SL             | TTTAGCGGCTTTTCCAGTT<br>AC             |
| 33  | ndhD-878     |                |                                 |                |                                      |                        |                                       |
| 34  | ndhD-887     |                |                                 |                |                                      |                        |                                       |

**Table S4** Primers used in the qPCR.

| Locus     | Gene name    | Forward primer 5' - 3'    | Reverse primer 5' - 3'  |
|-----------|--------------|---------------------------|-------------------------|
| AT1G29910 | LHCB1.2      | AGGCTACAGAGTCGCAGGAAAT    | TCTCTATCGGTCCCTTACCAGTG |
| AT1G76100 | PLASTOCYANIN | CAACGCAGGGTTCCACAT        | CGACAATAGAAACCGTAAGAGC  |
| AT3G01500 | CA1          | GACTTTCAGCCAGGAGATGCC     | TAAGGTGTAAGACCGCGTATTCA |
| AT2G05070 | LHCB2.2      | TTGACCCGCTTTATCCCG        | AGGCGTTGTTAGCCACAGG     |
| AT3G62410 | CP12         | AGCCGATTAAGCAGCACCG       | GCTAAGTCTTCAACCTCGTCCC  |
| AT4G02510 | PPI2         | TGAGGCTGAGGGCAACGA        | CATCAATGGACGCAATCTGGT   |
| AT1G13320 | PP2AA3       | CATGCAATGGTTACAAGACAAGGTT | CGAGAAGCGATACTGCACGAA   |

## SI References

1. Koussevitzky S, et al. (2007) Signals from chloroplasts converge to regulate nuclear gene expression. *Science* 316:715–719.
2. Alonso JM, et al. (2003) Genome-wide insertional mutagenesis of *Arabidopsis thaliana*. *Science* 301:653–657.
3. Cottage A, Mott EK, Kempster JA, Gray JC (2010) The *Arabidopsis* plastid-signalling mutant *gun1* (*genomes uncoupled1*) shows altered sensitivity to sucrose and abscisic acid and alterations in early seedling development. *J Exp Bot* 61:3773–3786.
4. Waadt R, et al. (2008) Multicolor bimolecular fluorescence complementation reveals simultaneous formation of alternative CBL/CIPK complexes in planta. *Plant J* 56:505–516.
5. Yoo S-D, Cho Y-H, Sheen J (2007) *Arabidopsis* mesophyll protoplasts: a versatile cell system for transient gene expression analysis. *Nat Protoc* 2:1565–1572.
6. Chen H, et al. (2008) Firefly luciferase complementation imaging assay for protein-protein interactions in plants. *Plant Physiol* 146:368–376.
7. Earley KW, et al. (2006) Gateway-compatible vectors for plant functional genomics and proteomics. *Plant J* 45:616–629.
8. Clough SJ, Bent AF (1998) Floral dip: a simplified method for *Agrobacterium*-mediated transformation of *Arabidopsis thaliana*. *Plant J* 16:735–743.
9. He L, Diedrich J, Chu Y-Y, Yates JR (2015) Extracting accurate precursor information for tandem mass spectra by RawConverter. *Anal Chem* 87:11361–11367.
10. Xu T, et al. (2015) ProLuCID: An improved SEQUEST-like algorithm with enhanced sensitivity and specificity. *J Proteomics* 129:16–24.
11. Tabb DL, McDonald WH, Yates JR (2002) DTASelect and Contrast: tools for assembling and comparing protein identifications from shotgun proteomics. *J Proteome Res* 1:21–26.
12. Peng J, Elias JE, Thoreen CC, Licklider LJ, Gygi SP (2003) Evaluation of multidimensional chromatography coupled with tandem mass spectrometry (LC/LC-MS/MS) for large-scale protein analysis: the yeast proteome. *J Proteome Res* 2:43–50.
13. Czechowski T, Stitt M, Altmann T, Udvardi MK, Scheible W-R (2005) Genome-wide identification and testing of superior reference genes for transcript normalization in *Arabidopsis*. *Plant Physiol* 139:5–17.
14. Kim D, et al. (2013) TopHat2: accurate alignment of transcriptomes in the presence of insertions, deletions and gene fusions. *Genome Biol* 14:R36.
15. Langmead B, Salzberg SL (2012) Fast gapped-read alignment with Bowtie 2. *Nat Methods* 9:357–359.
16. Anders S, Pyl PT, Huber W (2015) HTSeq—a Python framework to work with high-throughput sequencing data. *Bioinformatics* 31:166–169.
17. Robinson MD, McCarthy DJ, Smyth GK (2010) edgeR: a Bioconductor package for differential expression analysis of digital gene expression data. *Bioinformatics* 26:139–140.
18. Heberle H, Meirelles GV, da Silva FR, Telles GP, Minghim R (2015) InteractiVenn: a web-based tool for the analysis of sets through Venn diagrams. *BMC Bioinformatics* 16:169.
19. Tian T, et al. (2017) agriGO v2.0: a GO analysis toolkit for the agricultural community, 2017 update. *Nucleic Acids Res* 45:W122–W129.
20. Sun F, et al. (2013) Global transcriptome analysis of *AtPAP2* - overexpressing *Arabidopsis thaliana* with elevated ATP. *BMC Genomics* 14:752.

**Dataset S1.** Differentially expressed genes in *Col6-3* after NF treatment (*A*), in *gun1-9* compared with *Col6-3* under NF treatment (*B*), in *MORF2OX(s)* compared with *Col6-3* under NF treatment (*C*) and in *MORF2OX(w)* compared with *Col6-3* under NF treatment (*D*).

**Dataset S2.** The expression pattern of GUN1-dependent retrograde signaling genes under NF treatment (*A*) and the expression profile of nuclear encoded photosynthesis genes under NF treatment (*B*).
